# Supplementary material for: Antisense Oligonucleotide-Based Rescue of Aberrant Splicing Defects Caused by 15 Pathogenic Variants in ABCA4
Source: MDPI journal article supplement (doi:10.3390/ijms22094621), 2021-04-28
Supplement: s1 [file s1]

**Supplementary Figure S1. Genomic regions of interest used for antisense oligonucleotide (AON) design.** Position of the antisense sequences (underlined), exon elongations or pseudoexon (PE) inclusions (grey), enhancer splicing motifs (green) and variants (yellow) are indicated for every analyzed region.

**c.1937+37C>G**

CAGGGGAUACAAGGAGCCAGGUGCAGGCGGAGGCUCCAGUUGGAAUCUACCUCCAGCAGAU  
GCCCUACCCCUUGCUCUGUGGACGAUUCGUGAGUCUGAAGUUCGCGAUCCUCCUCCAUGACAC  
GGUAAUGGGGUGCUGGAGUGGGCUGGGGUGGGCUGGGGUGCCCUCAAGGCUUCCAUGU  
CUUUAGAGAGAGCCCCAGGGACCAGAGCCAAAUUGGAGAGCAUGGAGCUCUGACUGAGGAAC  
CUGC

**Exon 13**

Exon elongation: r.1937\_1938ins1937+1\_1937+36 (36-nt elongation at SDS)

**AON1:** 5'- CCGUGUCAUGGAGGAGGAUC-3' (target sequence: GAUCCUCCUCCAUGACACGG)

**AON2:** 5'- CCAUUACCGUGUCAUGGAGGA-3' (target sequence: UCCUCCAUGACACGGUAAUGG)

**c.3191-11T>A**

ACGCUAUAACAUCUAAGAGGCAGCACCAAAACACUGCUGGGUUAAGGUACCCCCACAAUGCC  
ACUUGCCCUUGGGCCUUUCUCUCCUACCCUCCACAGCCCCUUAACUCUCCCGUCCUUCUAG  
UGCCUCCAGGUGGCAUGCAGAGAAAGCUGUCGGUUGCCAUUGCCUUUGUGGGAGAUGCCAAG  
GUGGUGAUUCUGGACGAACCCACCUCUGGGGUGGACCCUACUCGAGACGCUCAAUCUGGGA  
U

**Exon 21**

Exon elongation: r.3190\_3191ins3191-1\_3191-9 (9-nt elongation at SAS)

**AON1:** 5'-GCACUAGAAGGACGGGAG-3' (target sequence: CUCCCGUCCUUCUAGUGC)

**c.4352+61G>A**

CAGACGUCCUCCUGAAUAAGCCAGGCUUUGGCAACCGCUGCCUGAAGGAAGGGUGGCUUCCG  
UAAGUGCCUACGCGCCCCUGUCCUAAGAAGACUAGCUCCCCUGGGAGGACCCAACGGUGAGU  
UCAAGAUGGCAGGCGUUGGGGAGGCCCCACUCAAUCCUGCUCUGCUGGUCACUUCCAUGUCU  
CUGACCAGCACUCCCCCAACCUCUCCUUCCACACUUGUGUGCAGGGACAUUCACUACCUCUA  
G

**Exon 29**

Exon elongation: r.4352\_4353ins4352+1\_4352+57 (57-nt elongation at SDS)

**AON1:** 5'-GAACUCACCGUUGGGUCCU-3' (target sequence: AGGACCCAACGGUGAGUUC)

**AON2:** 5'-UCUUGAACUCACCGUUGG-3' (target sequence: CCAACGGUGAGUUCAAGA)

### c.67-2023T>G

AGACUCAGAGGUUAAGCAAGCCCCAAAGUGGUUGUUAACCCAGAUCUUCCCACUAACUCCCAA  
AUCAGCAUCAGUGUUUAAACGUACCAGACCUCUCCCAGAUAGAUGUUGCCGCAUGGAAGACAGC  
CGAUCUACGUGAUAGAAAGCCAAUUAUUGCAAGCAGUCGUCUAAAGGAGUCAAAUGUGUUGGAU  
UUGAACUGGAUGUCUCAUUUCUUUGGUGAAGACACUGGAAACAACUCCAGGUUUCAUCAAUU  
GCUCCUAUCACUCAACGUUGCUAUCUUACUGAACUU **GUUCCCCAG** CCUUACCCACUGAUGGAA  
UGAUCCAGAAUGGAAGACAAGACACCAA **G** GUACAUGACCCUGGGGGAGGCUGUUUCUUAUAUC  
UACAGACUGUUGGUGACCUGAGCCCCAUGUCACCAAAGGCUUUCCUGGAGAAGCCUCCUAGA  
CCAGUCUUGACAAAGGCUCACUCAUUCG

#### SC35 motif

PE inclusion: r.66\_67ins66-2266\_66-2023 (PE 243 bp)

**AON1:** 5'-UGCGGCAACAUCUAUCUGG-3' (target sequence: CCAGAUAGAUGUUGCCGCA)

**AON2:** 5'-CAUCAGUGGGUAAGGCUG-3' (target sequence: CAGCCUUACCCACUGAUG)

### c.570+1798A>G

CCCCACAGAGGGGUGCUGUCGGCACCGAUUGCUCAUUUCCCCUUUGCUUUCUCUUC **AGCU**  
**CGUA** AAACUCAAGUCCUGACAAUGCCUUGAU **GACUUGCA** GUUGGUAAUAAAAGGGAGAUGAAG  
**G** UAAGGACAGGAUUUUCGGGGAAAUUCUUUCCAGUCCUUAUAUGUGACAUUUAGAUCUC  
UAGUACUGUGCUUCUGGCAUCAGUGCCAAGGCCUUUCAUGUUGGAGAAUGGAGGCCGGGGUC

#### SC35 motif

PE inclusion: r.570\_571ins570+1733\_570+1797 (PE 65 bp)

**AON1:** 5'-CUGGAAGUCAUCAAGGCAUUG-3' (target sequence: CAAUGCCUUGAUGACUCCAG)

**AON2:** 5'-GACUUGAGUUUUACGAGCUG-3' (target sequence: CAGCUCGUAAAACUCAAGUC)

### c.769-788A>T

UUGGAUGAGAAUUACAAGUCCAGCUGGUUAAAAGGCACAUGCCCAGUGCUCACUUCACACCUA  
CUCAGGAAGCACACUUGAGUUGGAAAACACUGUCUUUACACUUAAGAACUCAGUCCUACAUG **U**  
CUCCUCUAG **GAUCAGUG** AUUCCAUCAGUUUUGAAACAUGAAGCAUGAAGUCAAAACAGGACAUG  
ACCUUGGUUUCAGAAAACCAUGUUCACAUCAGUCUCUGGAGCUUGGAGGCAGCACACCU  
**GGG** **GACUUGCA** **CAUCCCCUG** CCGAGGUGGCAAAAGCAGGAGCAGUGGUGAGUUCACAUUGGG  
UGGGGUUUCUGAACACUGCUGGCAAUUGGAGAAUCUGCAAGGGAACUUCUCCGACUCCUAC  
CAGCAGCUGCUUUAAAUAAGGUGAUGUAGCUGGUCAAUCCUCCA

#### SC35 motif

PE inclusion: r.768\_769ins769-778\_769-617 (PE 162 bp)

**AON1:** 5'-GGAAUCACUGAUCCUAGAGG-3' (target sequence: CCUCUAGGAUCAGUGAUUCC)

**AON2:** 5'-GGAUGUGGAAGUCCCCAGG-3' (target sequence: CCUGGGGACUCCACAUC)

### c.859-640A>G

AACUAAAUUUUAGACUAAUUAGCCAAAGAAAUUUGCUCUGAUCUUGCUUUUCUACAACAGAAU  
CAUUCCCCAUUAUUUUUUAUUCUCCUUUUU **CUCCCCAG** UAUCCCCAUUUGGUG **GGACAACA**  
**GAACCCAA** GAACUGGCUUAAC **G** GUAAAAUUAUUUCUGCAUUUUGCCAAGGACACAUUCCCAAC  
GAAUUCAAAUAAGGA **GACUAGAA** GAAGAGAGGCUAUACUACAGUGCUCUAGGGGUCACUC

[illegible]

**AON3:** 5'-CCUCUCUUCUUCUAGUCUCC-3' (target sequence: GGAGACUAGAAGAAGAGAGG)

CUAUCCUACUAGAUUGUUGGAAACAGAUUAUAUAGAUGAAAAUUAGUUGAUUAAAAUUGAAAUU  
UGUGCAUAAUUCAAAAGUUUUUAUUUUAGCCAAGCUAAAGCUUUUCAUUUUAUUCAACAGCUAUUU  
ACUGAGCAGCACCUGUGCAUGAGGCUCAGCAGGGCCAGGUUCUGGGAACAGAGCGGUGGAGA  
UAAAGAUCAGACCUGCCCGAGGAAUAGACA GUCCAGUGGCAGCAAAGGCCAUGAAACAUAC  
GGUAACUCUUAAAAAAGCCGAGACCAUGAUUUUACAAAUCAACAUUUUGUAGGGAGCAGAA  
CUUUC

**AON2:** 5'-UCUUUAUCUCCACCGCUCUG-3' (target sequence: CAGAGCGGUGGAGAUAAAGA)

AUGUGGGGCCGUGCCAUAUUAUUGGUUCUGUUUCCUCUAGUGGUUGAUCGCGGAGAUU  
UCGGCUUCUCCAUCAGGACAAGUUCAGAUAGCCUGAGAUGGUAUCA**GAACUCAGGGACAGAG**  
**CUGGGUGUGGGCGGCCCU**GCAUCCAUCUGCUUUCUCUCCAUGCUAACUGAUA**AGGUCAGAG**AG  
CUGGAAGCAAUUCCAGGACCCAGGGCUCCGCAAAGGCAAACACAUUACUUAUCGGCUGCU  
GA

**AON2:** 5'-GCUCUGUCCCUGAGUUCUG-3' (target sequence: CAGAACUCAGGGACAGAGC)

**c.3050+370C>T**

GUCCUUUGUCCUACUUGCAGUGAGAAUUGUCCUCAGAAUAUGGGACUCUGCCUCUGCUGCU  
CAGAGCUGAGGGCUCUCCUCAGAAAGGUGAGGCUGCCUUCGCUCUGACAGAGCAGCUGAU  
CGAUCCCCAGCCCCUUGUGCAGCCUGAAGUACUUCUCUGGGACCAAAGACAGGAGAA  
CCAUUGUUCUUUUUCCUGUUGAAGCCACGGCCUGAAAGUAACUUUUCAGGGGGCUIIUC  
AG

**SC35 motif**

PE inclusion: r.3050\_3051ins3050+164\_3050+368 (PE 205 bp)

**AON1:** 5'-CAGAGUCCCAUAUUCUCAGG-3' (target sequence: CCUGAGAAUAUGGGACUCUG)

**AON2:** 5'-GGAUCGAUCAGCUGCUCUG-3' (target sequence: CAGAGCAGCUGAUCGAUCC)

**c.4539+2064C>T**

UUAUAUUUCUCAAGCAAUAUUUUCUCUCUUUGAAUCACAGCUCUUCUGCAUCAUAGGGAU  
CCCAAAGAAGGACCCAAGGAACUUGUCUCAGUCCUCUGCCCCAAGAGGAAGCUUUGCUU  
GUUUGCUUUGCUGUCAUUGCUGAGGGCUCUUGGUGGCCUCCACUCAAACCCUCCAGCAU  
CAGGACGUCUAGGCUGUGAUACUGUACUCCAGCUCUUGGCCAGGGCGAGGGAGGGGAGGC  
CAAGCCUACCUACAUGGUGUUUCAAUUUCCUAAACGAACCCUUAUCCACGCGGUCUGUCCAG  
CUUAGAAACUUAUUUUCAGUAGUGUUGGUCCUUGGUCCUGGACAAAUGUAACAGCCAAAGU  
CCUAGAAAAAGGCAAGCCAGUUCUGCCAUUUUCUUUACUUCUGCAUUUCC

**c.4539+2065C>G**

UUAUAUUUCUCAAGCAAUAUUUUCUCUCUUUGAAUCACAGCUCUUCUGCAUCAUAGGGAU  
CCCAAAGAAGGACCCAAGGAACUUGUCUCAGUCCUCUGCCCCAAGAGGAAGCUUUGCUU  
GUUUGCUUUGCUGUCAUUGCUGAGGGCUCUUGGUGGCCUCCACUCAAACCCUCCAGCAU  
CAGGACGUCUAGGCUGUGAUACUGUACUCCAGCUCUUGGCCAGGGCGAGGGAGGGGAGGC  
CAAGCCUACCUACAUGGUGUUUCAAUUUCCUAAACGAACCCUUAUCCACGCGGUCUGUCCAG  
CUUAGAAACUUAUUUUCAGUAGUGUUGGUCCUUGGUCCUGGACAAAUGUAACAGCCAAAGU  
CCUAGAAAAAGGCAAGCCAGUUCUGCCAUUUUCUUUACUUCUGCAUUUCC

**SC35 motif**

PE inclusion: r.4539\_4540ins4539+1891\_4540-2162 (345 bp)

PE inclusion: r.4539\_4540ins4539+1891\_4540-2060 (170 bp)

**AON4:** 5'-GGGGCACAGAGGACUGAGA-3' (target sequence: UCUCAGUCCUCUGUGCCCC)

**AON17:** 5'-GCCAAGAGCUCAGGGUACAG-3' (target sequence: CUGUACCCUGAGCUCUUGGC)

**c.4634+741A>G**

CAGGUCAACUGCAGCUGUCAUAUUCUAACUGUGAAUAUCAUCUUUGAUCACUGCCCUUUGAG  
AUGCCAAUGAACUUUUAAGAAUAUCUAGUUCUCUUGGCUCUCCAGCUGUUCUUAUCAGCCC  
CAUCCAGGAUGGAACAGCUUUGGCAGCCCGUACAGAACAAGCAGCUUGACAGGGGCAUGCC  
AUGCCAGGAGAGAGGAUCCUAGGAAGCGUGGUCCAGUCCGCACAGGCUCUGGGGCUUUAAG  
GUAAAACCUCCUGUCUAACUUUAGUAGGACUUUCUGUUGCUUACCUGCCAGAGCCCUGAAC  
GAGGGAUAAUUGACUUAAUUAACUAGAACACACUGCAAUUGGUGAAAGCAUUUAGCAAAA

**SC35 motif**

PE inclusion: r.4634\_4635ins634+614\_4634+740 (PE 127 bp)

**AON1:** 5'-UCUGAUACGGGCUGCCAAAG-3' (target sequence: CUUUGGCAGCCCGUAUCAGA)

**AON2:** 5'-UCCUUAGGAUCCUCUCUCCU-3' (target sequence: AGGAGAGAGGAUCCUAAGGA)

**c.6283-78G>T**

**GCCUUCUG**ACAAAUGUAUUUGCAGGAUUUUUCUUUUUUUGAGGAGAAUUCUGUCAUUGCCUUA  
AUCCACUUUAAUCCCCUCGUGGGCUGAAAUGGGCCCAGGAUGGACGCCACGCUUCUUUACUC  
UUGGAUCCACCUCUGCCUUCCCUACCCUACACCAGGGUACCCUUGUCUUGCUCUAGUGAGG  
GGAGUGACUGUGUGC**GCCUUCUG**UCAGCUCAUCCUCCACAGG**U**GAGCCAGCCCAGGGGGAAG  
CA

**SC35 motif**

PE inclusion: r.6283\_6283ins6283-282\_6283-80 (PE 203 bp)

**AON1:** 5'-GGCAAUGACAGAAUUCUCCUC-3' (target sequence: GAGGAGAAUUCUGUCAUUGCC)

**AON2:** 5'-GCUGACAGAAGGCGCACAC-3' (target sequence: GUGUGCGCCUUCUGUCAGC)

**Supplementary Figure S2. Sequence analysis of the resulting RT-PCR products from rescue experiments of near-exon variants causing exon elongation.** Sanger sequencing chromatograms from splicing correction experiments targeting c.1937+37C>G (A), c.3191-11T>A (B) and c.4352+61G>A (C) variants. For each case, sequences of the correct transcript from wild-type *ABCA4* midigene condition (i), AON-corrected transcript in mutant *ABCA4* midigene condition (ii) and exon elongation transcript in mutant *ABCA4* midigene condition (iii) are shown.

**A. Variant c.1937+37C>G**

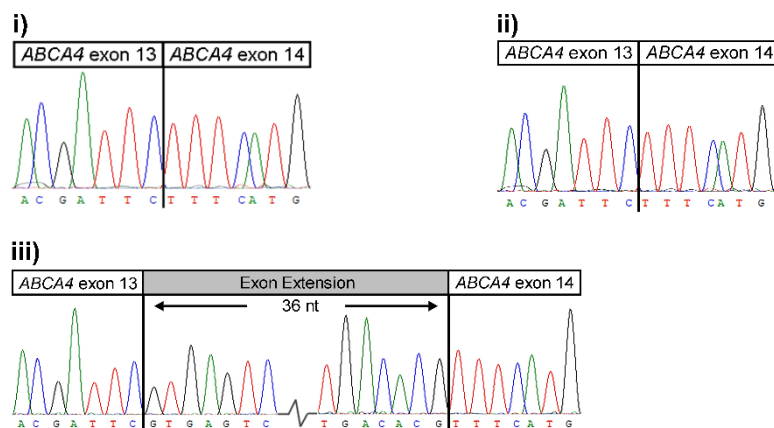

**B. Variant c.3191-11T>A**

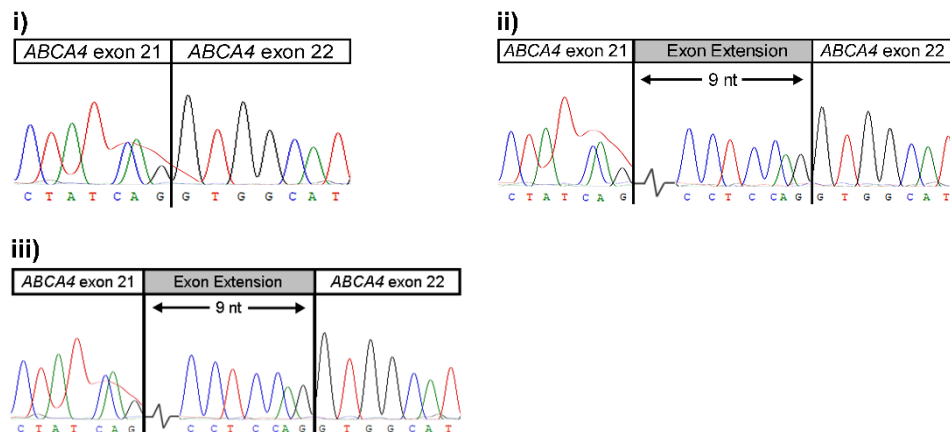

**C. Variant c.4352+61G>A**

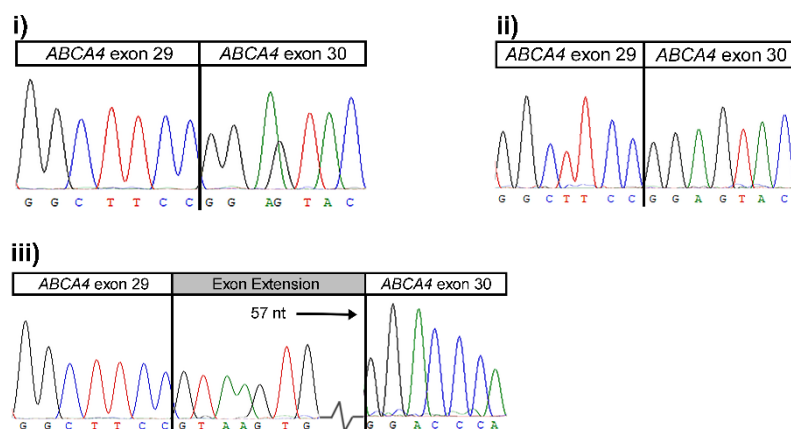

**Supplementary Figure S3. Sequence analysis of the resulting RT-PCR products from rescue experiments of deep-intronic variants causing not overlapping pseudoexon (PE) inclusion.** Sanger sequencing chromatograms from splicing correction experiments targeting c.67-2023T>G (A), c.570+1798A>G (B), c.769-788A>T (C), c.2588-706C>T (D), c.2919-826T>A (E), c.3050+370C>T (F), c.4634+741A>G (G) and c.6283-78G>T (H) variants. For each case, sequences of the correct transcript from wild-type *ABCA4* midigene condition (i), AON-corrected transcript in mutant *ABCA4* midigene condition (ii) and PE inclusion transcript in mutant *ABCA4* midigene condition (iii-v) are shown.

#### A. Variant c.67-2023T>G

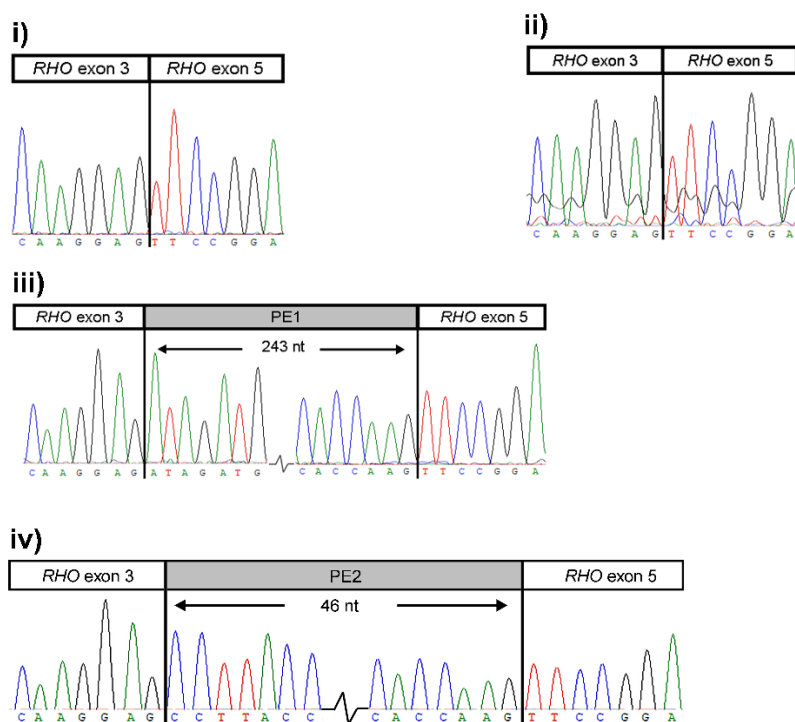

#### B. Variant c.570+1798A>G

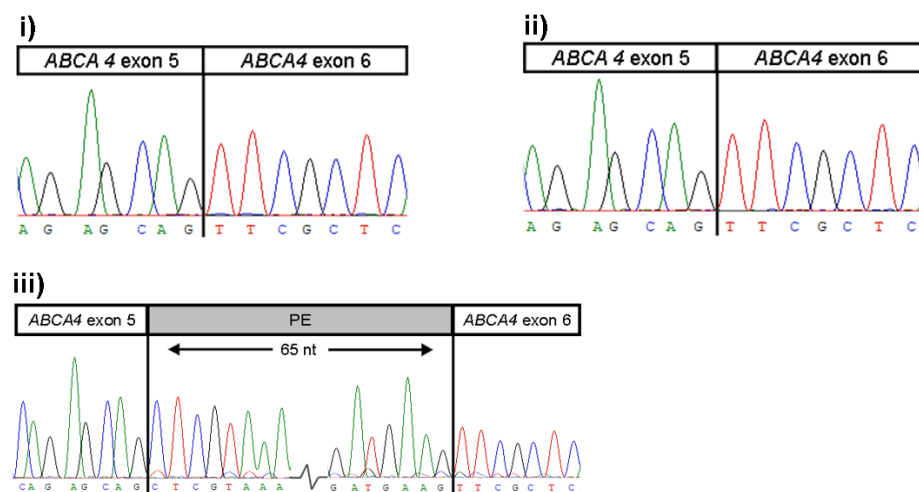

### C. Variant c.769-788A>T

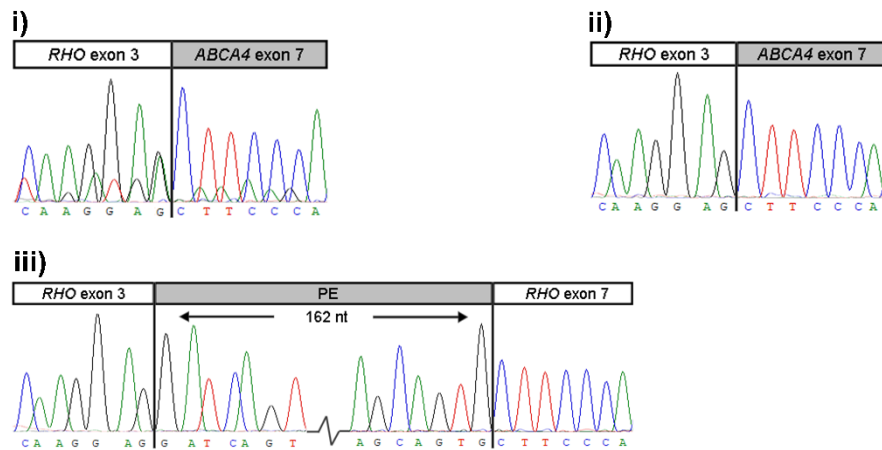

### D. Variant c.2588-706C>T

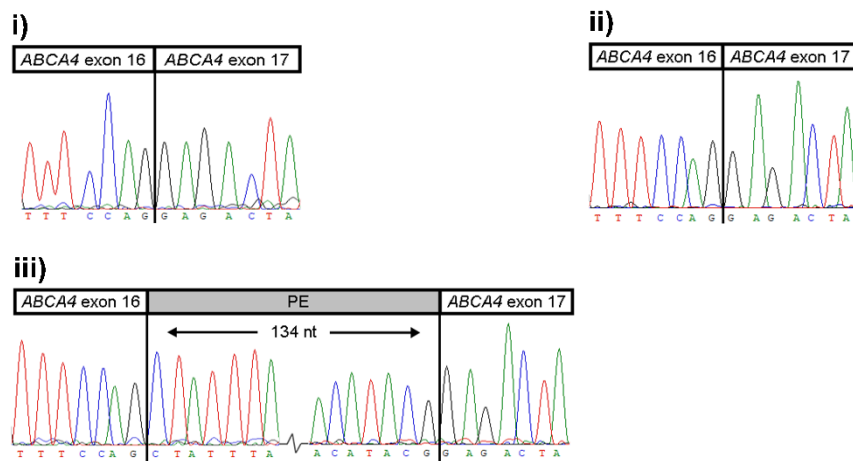

### E. Variant c.2919-826T>A

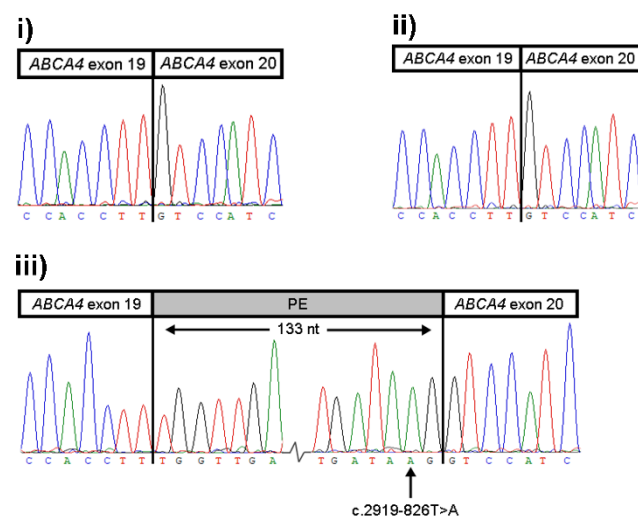



## F. Variant c.350+370C>T

i)

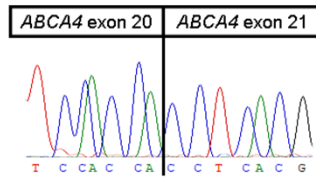

ii)

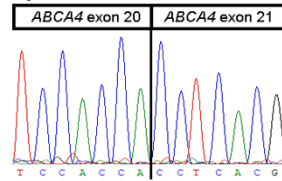

iii)

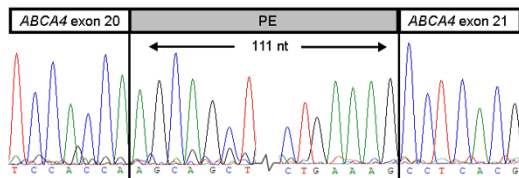

iv)

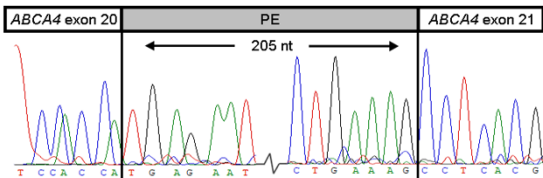

## G. Variant c.4634+741A>G

i)

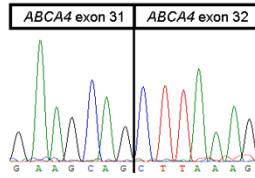

ii)

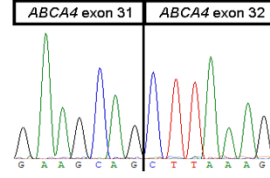

iii)

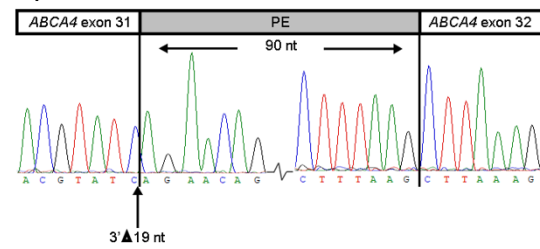

iv)

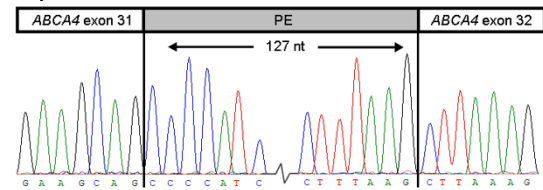

v)

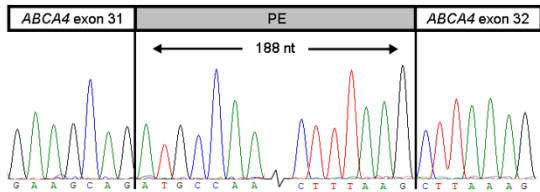

H. Variant c.6283-78G>T

i)

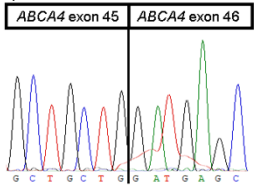

ii)

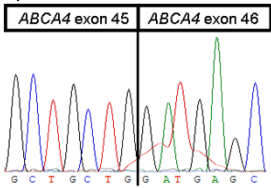

iii)

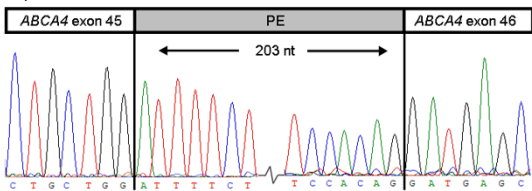

**Supplementary Figure S4. Sequence analysis of the resulting RT-PCR products from rescue experiments of deep-intronic variants causing similar pseudoexon (PE) inclusion in the same region.** Sanger sequencing chromatograms from splicing correction experiments targeting c.859-640A>G/c.859-546G>A (**A**) and c.4539+2064C>T/c.4539+2065C>G (**B**) variants. For each case, sequences of the correct transcript from wild-type *ABCA4* midgene condition (**i**), AON-corrected transcript in mutant *ABCA4* midgene condition (**ii-iii**) and PE inclusion transcript in mutant *ABCA4* midgene condition (**iv-vi**) are shown.

**A. Variants c.859-546G>A and c.859-640A>G**

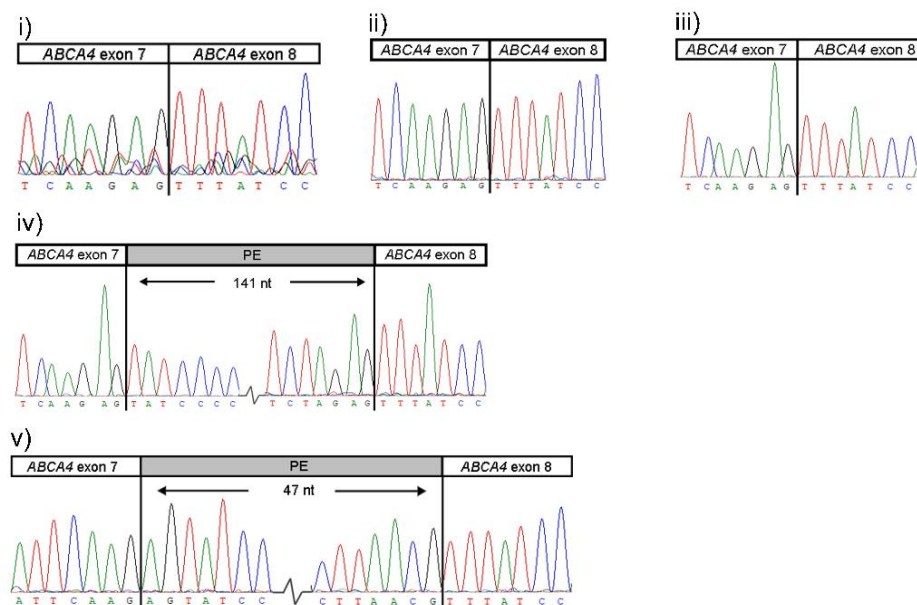

**B. Variants c.4539+2064C>T and c.4539+2065C>G**

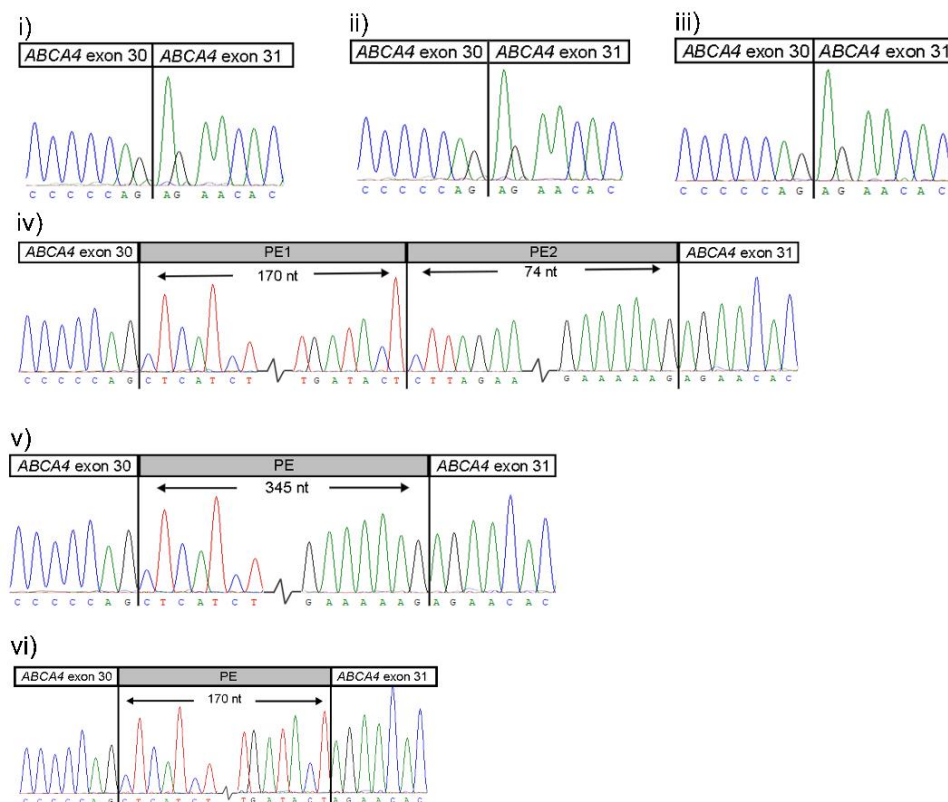

**Supplementary Figure S5. Aberrant splicing rescue for c.4539+2064C>T and c.4539+2065C>G deep-intronic variants by 2'-OMe-PS AON4 and AON17. A)** Analysis of splicing correction by reverse transcription polymerase chain reaction (RT-PCR) upon AON delivery. Wild-type (WT) midigenes and the corresponding mutant midigenes containing variants c.4539+2064C>T and c.4539+2065C>G were transfected in HEK293T, leaving one empty as endogenous HEK293T expression control (END). The different AONs and a SON (2'-OMe-PS) were then delivered, except for the non-treated lanes (NT). Genomic region of the different midigenes is depicted on top of each representative RT-PCR image, whereas the graphs next to each panel represent the semi-quantification of the resulting RT-PCR products, showing the % of correct and pseudoexon (PE) inclusion transcripts. MQ shows the negative control of the PCR reaction and amplification of exon 5 of Rhodopsin (RHO) gene was used as a transfection control. Data (n=2) are presented as mean±SD (\*p<0.05, \*\*p<0.01, \*\*\*p<0.001, \*\*\*\*p<0.0001). **B)** Predicted binding of AON17 on target pre-mRNA presenting c.4539+2064C>T or c.4539+2065C>G variants (predictions were obtained using RNA structure software: <http://rna.urmc.rochester.edu/RNAstructureWeb/>).

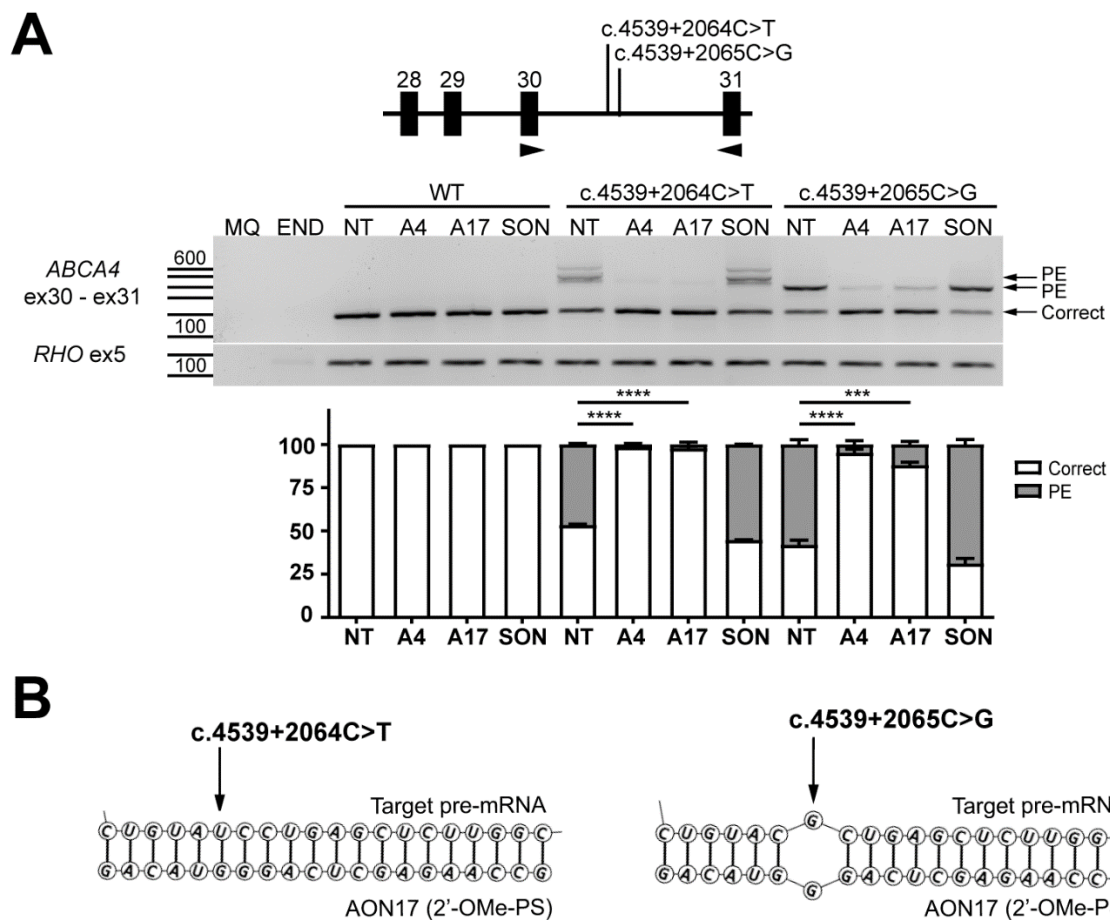

**Supplementary Table S1. *ABCA4* allele count and RNA defect associated to the analyzed intronic variants (adapted from Cremers *et al.*, PRER, 2020).**

| Variant        | Allele count | RNA defect                            |
|----------------|--------------|---------------------------------------|
| c.1937+37C>G   | 2            | r.1937_1938ins1938+1_1938+36          |
| c.3191-11T>A   | 1            | r.3190_3191ins3191-1_3191-9           |
| c.4352+61G>A   | 2            | r.[4352_4353ins4352+1_4352+57,=]      |
| c.67-2023T>G   | 4            | r.[66_67ins67-2266_67-2024,=]         |
| c.570+1798A>G  | 3            | r.570_571ins570+1733_570+1797         |
| c.769-788A>T   | 1            | r.768_769ins769-778_769-617           |
| c.859-640A>G   | 2            | r.858_859ins859-685_859-640           |
| c.859-546G>A   | 1            | r.[858_859ins859-545_859-685,=]       |
| c.2588-706C>T  | 1            | r.[2587_2588ins2588-839_2588-708,=]   |
| c.2919-826T>A  | 2            | r.[2918_2919ins2919-957_2919-825,=]   |
| c.3050+370C>T  | 2            | r.3050_3051ins3050+164_3050+368       |
| c.4539+2064C>T | 27           | r.[4539_4540ins4539+1891_4540-2162,=] |
| c.4539+2065C>G | 1            | r.[4539_4540ins4539+1891_4539+2060,=] |
| c.4634+741A>G  | 1            | r.[4634_4635ins4634+614_4634+740,=]   |
| c.6283-78G>T   | 2            | r.[=,6283_6283ins6283-282_6283-80]    |

**Supplementary Table S2. Primer sequences for site-directed mutagenesis in entry clones.**

| Wild-type fragment | DNA variant_primer orientation | Sequence (5'-3')                    |
|--------------------|--------------------------------|-------------------------------------|
| BA16               | c.3191-11T>A_forward           | CTTA ACTCTCCCGTCCTTCTAGTGCCTCCAGGTG |
| BA16               | c.3191-11T>A_reverse           | CACCTGGAGGCACTAGAAGGACGGGAGAGTTAAG  |

**Supplementary Table S3. Primer sequences for validation of genomic *ABCA4* regions in entry clones.**

| BA_ID | Primer number | Sequence (5'-3')      | Intron/Exon | Forward/Reverse | Genomic position (hg19) | cDNA position (hg19) |
|-------|---------------|-----------------------|-------------|-----------------|-------------------------|----------------------|
| BA16  | 61730         | AGCAGGGTCTGCTATTTTTGT | Intron 20   | Forward         | 94509189                | 3051-158             |
| BA16  | 48620         | TTGGCAATCAAGATGCTCAC  | Intron 20   | Reverse         | 94509126                | 3051-95              |
| BA16  | 47862         | AGATGGAAGCCATGTTGGAG  | Exon 21     | Forward         | 94508960                | 3122                 |
| BA16  | 61731         | ACTTCACAGAGGTGTTCCAC  | Intron 21   | Reverse         | 94508770                | 3190+122             |
| BA16  | 43375         | AATCACCACCTTGGCATCTC  | Exon 22     | Reverse         | 940508393               | 3252                 |
| BA16  | 47864         | TGCGCAAGATGAAAAACATC  | Exon 23     | Forward         | 94506808                | 3479                 |
| BA16  | 61733         | CTTTGGGAATGAAGGAAGAAG | Intron 24   | Reverse         | 94505416                | 3607+183             |

**Supplementary Table S4. Primer sequences for reverse transcription-PCR analysis.**

| Variant ID                  | Primer number | Primer sequence (5'-3')  | Genomic position (hg19) | cDNA position (hg19) | Product size (bp) |
|-----------------------------|---------------|--------------------------|-------------------------|----------------------|-------------------|
| BA11 c.1937+37C>G_Foward    | 47856         | GCCTATCTGCAGGACATGGT     | 94528245                | 1825                 | 218               |
| BA11 c.1937+37C>G_Reverse   | 47855         | CGCAACTCCTTCTCCAAGAC     | 94526211                | 2042                 |                   |
| BA20 c.4352+61G>A_Foward    | 73988         | GCAGTTCACGGTACTTGCAG     | 94496061                | 4275                 | 149               |
| BA20 c.4352+61G>A_Reverse   | 47869         | GGAACAGCTGGGTGATGTTT     | 94495117                | 4423                 |                   |
| BA16 c.3191-11T>A_Foward    | 47862         | AGATGGAAGCCATGTTGGAG     | 94508960                | 3122                 | 185               |
| BA16 c.3191-11T>A_Reverse   | 71433         | ATCCAGATTGAGCGTCTC       | 94508339                | 3306                 |                   |
| BA3 c.570+1798A>G_Foward    | 66967         | GGAATACGAATAAGGGATATCTTG | 94568693                | 448                  | 298               |
| BA3 c.570+1798A>G_Reverse   | 75865         | CCACGTTGGCATAACAGAGTG    | 94564373                | 745                  |                   |
| BA21 c.4634+741A>G_Foward   | 74420         | AAGACCTGACGGACAGGAAC     | 94490576                | 4568                 | 94                |
| BA21 c.4634+741A>G_Reverse  | 47871         | TCATTGACCCAGAATTTGCTC    | 94488948                | 4661                 |                   |
| BA28 c.6283-78G>T_Foward    | 47884         | GACTGTCTACGCCGACTGC      | 94467516                | 6180                 | 189               |
| BA28 c.6283-78G>T_Reverse   | 47883         | ACAGCCCTCCCTTCTCTGAT     | 94466576                | 6368                 |                   |
| BA13 c.2588-706C>T_Foward   | 42995         | TGTCCATGCAGATGATGCTC     | 94520741                | 2513                 | 100               |
| BA13 c.2588-706C>T_Reverse  | 47859         | CAAGGAAGTGGGGTTCCATA     | 94517230                | 2612                 |                   |
| BA6 c.769-788A>T_Foward     | 29999         | CGGAGGTCAACAACGAGTCT     | 129251150               | 587                  | 134               |
| BA6 c.769-788A>T_Reverse    | 47845         | ACGGCTGTCTAGGAGTGTGG     | 94548974                | 792                  |                   |
| BA15 c.2919-826T>A_Foward   | 75935         | TCTTTGAACGTGAGCATCCA     | 94512643                | 917                  | 295               |
| BA15 c.2919-826T>A_Reverse  | 76319         | AACAGGATGTTGTGCTGTGG     | 94510175                | 3044                 |                   |
| BA35 c.67-2023T>G_Foward    | 29999         | CGGAGGTCAACAACGAGTCT     | 129251150               | 587                  | 274               |
| BA35 c.67-2023T>G_Reverse   | 30000         | AGGTGTAGGGGATGGGAGAC     | 129252614               | *53                  |                   |
| BA15 c.3050+370C>T_Foward   | 75372         | GGGACATTGAAACCAGCCTG     | 94510244                | 2975                 | 253               |
| BA15 c.3050+370C>T_Reverse  | 71431         | TTCATTCCGCTTGTGGTG       | 94508911                | 3171                 |                   |
| BA7 c.859-640A>G_Foward     | 47848         | TCTGAGATCTTGGGGAGGAA     | 94548959                | 807                  | 254               |
| BA7 c.859-640A>G_Reverse    | 47847         | TGGAGTCAATCCCCAGAAAG     | 94546073                | 1060                 |                   |
| BA7 c.859-546G>A_Foward     | 47848         | TCTGAGATCTTGGGGAGGAA     | 94548959                | 807                  | 254               |
| BA7 c.859-546G>A_Reverse    | 47847         | TGGAGTCAATCCCCAGAAAG     | 94546073                | 1060                 |                   |
| BA20 c.4539+2064C>T_Foward  | 47870         | AAACATCACCCAGCTGTTCC     | 94495136                | 4404                 | 186               |
| BA20 c.4539+2064C>T_Reverse | 43377         | ATGTTCTGTCCGTCAGGTC      | 94490555                | 4589                 |                   |
| BA20 c.4539+2065C>G_Foward  | 47870         | AAACATCACCCAGCTGTTCC     | 94495136                | 4404                 | 186               |
| BA20 c.4539+2065C>G_Reverse | 43377         | ATGTTCTGTCCGTCAGGTC      | 94490555                | 4589                 |                   |



**Supplementary Table S5. Semi-quantification analysis of the RT-PCR products from non-treated (NT) or AON/SON-treated samples.** The amount of the different transcripts is represented as a percent (%) of the total transcript for each condition or lane. The average of two independent experiments, followed by two independent semi-quantification for each replicate is provided. SD: standard deviation.

| Condition  | WT      |       |         |       |         |       |         |       | c.1937+37C>G |       |         |       |        |       |         |       |
|------------|---------|-------|---------|-------|---------|-------|---------|-------|--------------|-------|---------|-------|--------|-------|---------|-------|
|            | NT      |       | AON1    |       | AON2    |       | SON     |       | NT           |       | AON1    |       | AON2   |       | SON     |       |
|            | %       | SD    | %       | SD    | %       | SD    | %       | SD    | %            | SD    | %       | SD    | %      | SD    | %       | SD    |
| Correct    | 100,000 | 0,000 | 100,000 | 0,000 | 100,000 | 0,000 | 100,000 | 0,000 | 0,000        | 0,000 | 100,000 | 0,000 | 84,635 | 0,785 | 0,000   | 0,000 |
| Elongation | 0,000   | 0,000 | 0,000   | 0,000 | 0,000   | 0,000 | 0,000   | 0,000 | 100,000      | 0,000 | 0,000   | 0,000 | 15,365 | 0,785 | 100,000 | 0,000 |

| Condition  | WT      |       |         |       |         |       | c.3191-11T>A |       |         |       |         |       |
|------------|---------|-------|---------|-------|---------|-------|--------------|-------|---------|-------|---------|-------|
|            | NT      |       | AON1    |       | SON     |       | NT           |       | AON1    |       | SON     |       |
|            | %       | SD    | %       | SD    | %       | SD    | %            | SD    | %       | SD    | %       | SD    |
| Correct    | 100,000 | 0,000 | 100,000 | 0,000 | 100,000 | 0,000 | 0,000        | 0,000 | 0,000   | 0,000 | 0,000   | 0,000 |
| Elongation | 0,000   | 0,000 | 0,000   | 0,000 | 0,000   | 0,000 | 100,000      | 0,000 | 100,000 | 0,000 | 100,000 | 0,000 |

| Condition  | WT      |       |         |       |         |       |         |       | c.4352+61G>A |       |        |       |        |       |         |       |
|------------|---------|-------|---------|-------|---------|-------|---------|-------|--------------|-------|--------|-------|--------|-------|---------|-------|
|            | NT      |       | AON1    |       | AON2    |       | SON     |       | NT           |       | AON1   |       | AON2   |       | SON     |       |
|            | %       | SD    | %       | SD    | %       | SD    | %       | SD    | %            | SD    | %      | SD    | %      | SD    | %       | SD    |
| Correct    | 100,000 | 0,000 | 100,000 | 0,000 | 100,000 | 0,000 | 100,000 | 0,000 | 0,000        | 0,000 | 28,400 | 0,509 | 67,070 | 8,316 | 0,000   | 0,000 |
| Elongation | 0,000   | 0,000 | 0,000   | 0,000 | 0,000   | 0,000 | 0,000   | 0,000 | 100,000      | 0,000 | 71,600 | 0,509 | 32,930 | 8,316 | 100,000 | 0,000 |

| Condition | WT     |       |        |        |        |       |        |       | c.67-2023T>G |        |        |        |        |        |        |        |
|-----------|--------|-------|--------|--------|--------|-------|--------|-------|--------------|--------|--------|--------|--------|--------|--------|--------|
|           | NT     |       | AON1   |        | AON2   |       | SON    |       | NT           |        | AON1   |        | AON2   |        | SON    |        |
|           | %      | SD    | %      | SD     | %      | SD    | %      | SD    | %            | SD     | %      | SD     | %      | SD     | %      | SD     |
| Correct   | 90,730 | 5,020 | 76,490 | 12,912 | 83,940 | 9,023 | 88,505 | 8,577 | 26,825       | 5,890  | 35,435 | 0,304  | 90,375 | 13,244 | 21,560 | 14,368 |
| PE1       | 9,270  | 5,020 | 23,510 | 12,912 | 16,060 | 9,023 | 11,495 | 8,577 | 56,530       | 13,364 | 13,265 | 11,109 | 0,000  | 0,000  | 64,710 | 18,979 |
| PE2       | 0,000  | 0,000 | 0,000  | 0,000  | 0,000  | 0,000 | 0,000  | 0,000 | 16,645       | 7,474  | 51,295 | 11,406 | 9,625  | 13,244 | 13,730 | 4,610  |

| Condition | WT      |       |         |       |         |       |         |       | c.570+1798T>G |       |         |       |         |       |         |       |
|-----------|---------|-------|---------|-------|---------|-------|---------|-------|---------------|-------|---------|-------|---------|-------|---------|-------|
|           | NT      |       | AON1    |       | AON2    |       | SON     |       | NT            |       | AON1    |       | AON2    |       | SON     |       |
|           | %       | SD    | %       | SD    | %       | SD    | %       | SD    | %             | SD    | %       | SD    | %       | SD    | %       | SD    |
| Correct   | 100,000 | 0,000 | 100,000 | 0,000 | 100,000 | 0,000 | 100,000 | 0,000 | 0,000         | 0,000 | 0,000   | 0,000 | 0,000   | 0,000 | 0,000   | 0,000 |
| PE        | 0,000   | 0,000 | 0,000   | 0,000 | 0,000   | 0,000 | 0,000   | 0,000 | 100,000       | 0,000 | 100,000 | 0,000 | 100,000 | 0,000 | 100,000 | 0,000 |

| Condition | WT      |       |         |       |         |       |        |       | c.769-788A>T |       |        |       |        |       |        |       |
|-----------|---------|-------|---------|-------|---------|-------|--------|-------|--------------|-------|--------|-------|--------|-------|--------|-------|
|           | NT      |       | AON1    |       | AON2    |       | SON    |       | NT           |       | AON1   |       | AON2   |       | SON    |       |
|           | %       | SD    | %       | SD    | %       | SD    | %      | SD    | %            | SD    | %      | SD    | %      | SD    | %      | SD    |
| Correct   | 100,000 | 0,000 | 100,000 | 0,000 | 100,000 | 0,000 | 97,975 | 2,864 | 20,095       | 4,264 | 94,110 | 2,843 | 94,630 | 4,752 | 15,300 | 0,792 |
| PE        | 0,000   | 0,000 | 0,000   | 0,000 | 0,000   | 0,000 | 2,025  | 2,864 | 79,905       | 4,264 | 5,890  | 2,843 | 5,370  | 4,752 | 84,700 | 0,792 |

| Condition | WT      |       |         |       |         |       |         |       |         |       |
|-----------|---------|-------|---------|-------|---------|-------|---------|-------|---------|-------|
|           | NT      |       | AON1    |       | AON2    |       | AON3    |       | SON     |       |
|           | %       | SD    |
| Correct   | 100,000 | 0,000 | 100,000 | 0,000 | 100,000 | 0,000 | 100,000 | 0,000 | 100,000 | 0,000 |
| PE        | 0,000   | 0,000 | 0,000   | 0,000 | 0,000   | 0,000 | 0,000   | 0,000 | 0,000   | 0,000 |

| Condition | c.859-640A>G |       |         |       |         |       |        |       |         |       |
|-----------|--------------|-------|---------|-------|---------|-------|--------|-------|---------|-------|
|           | NT           |       | AON1    |       | AON2    |       | AON3   |       | SON     |       |
|           | %            | SD    | %       | SD    | %       | SD    | %      | SD    | %       | SD    |
| Correct   | 0,000        | 0,000 | 100,000 | 0,000 | 100,000 | 0,000 | 24,335 | 5,848 | 0,000   | 0,000 |
| PE        | 100,000      | 0,000 | 0,000   | 0,000 | 0,000   | 0,000 | 75,665 | 5,848 | 100,000 | 0,000 |

| Condition | c.859-546G>A |       |         |       |         |       |         |       |        |       |
|-----------|--------------|-------|---------|-------|---------|-------|---------|-------|--------|-------|
|           | NT           |       | AON1    |       | AON2    |       | AON3    |       | SON    |       |
|           | %            | SD    | %       | SD    | %       | SD    | %       | SD    | %      | SD    |
| Correct   | 0,000        | 0,000 | 100,000 | 0,000 | 100,000 | 0,000 | 100,000 | 0,000 | 20,665 | 0,700 |
| PE        | 100,000      | 0,000 | 0,000   | 0,000 | 0,000   | 0,000 | 0,000   | 0,000 | 79,335 | 0,700 |

| Condition | WT      |       |         |       |         |       |         |       | c.2588-706C>T |       |        |       |         |       |        |       |
|-----------|---------|-------|---------|-------|---------|-------|---------|-------|---------------|-------|--------|-------|---------|-------|--------|-------|
|           | NT      |       | AON1    |       | AON2    |       | SON     |       | NT            |       | AON1   |       | AON2    |       | SON    |       |
|           | %       | SD    | %       | SD    | %       | SD    | %       | SD    | %             | SD    | %      | SD    | %       | SD    | %      | SD    |
| Correct   | 100,000 | 0,000 | 100,000 | 0,000 | 100,000 | 0,000 | 100,000 | 0,000 | 4,520         | 6,392 | 94,390 | 7,934 | 100,000 | 0,000 | 3,060  | 4,327 |
| PE        | 0,000   | 0,000 | 0,000   | 0,000 | 0,000   | 0,000 | 0,000   | 0,000 | 95,480        | 6,392 | 5,610  | 7,934 | 0,000   | 0,000 | 96,940 | 4,327 |

| Condition | WT      |       |         |       |         |       |         |       | c.2919-826T>A |       |        |       |         |       |        |       |
|-----------|---------|-------|---------|-------|---------|-------|---------|-------|---------------|-------|--------|-------|---------|-------|--------|-------|
|           | NT      |       | AON1    |       | AON2    |       | SON     |       | NT            |       | AON1   |       | AON2    |       | SON    |       |
|           | %       | SD    | %       | SD    | %       | SD    | %       | SD    | %             | SD    | %      | SD    | %       | SD    | %      | SD    |
| Correct   | 100,000 | 0,000 | 100,000 | 0,000 | 100,000 | 0,000 | 100,000 | 0,000 | 46,820        | 3,111 | 72,020 | 0,750 | 100,000 | 0,000 | 42,335 | 1,690 |
| PE        | 0,000   | 0,000 | 0,000   | 0,000 | 0,000   | 0,000 | 0,000   | 0,000 | 53,180        | 3,111 | 27,980 | 0,750 | 0,000   | 0,000 | 57,665 | 1,690 |

| Condition | WT      |       |         |       |         |       |         |       | c.3050+370 |       |        |       |        |       |        |       |
|-----------|---------|-------|---------|-------|---------|-------|---------|-------|------------|-------|--------|-------|--------|-------|--------|-------|
|           | NT      |       | AON1    |       | AON2    |       | SON     |       | NT         |       | AON1   |       | AON2   |       | SON    |       |
|           | %       | SD    | %       | SD    | %       | SD    | %       | SD    | %          | SD    | %      | SD    | %      | SD    | %      | SD    |
| Correct   | 100,000 | 0,000 | 100,000 | 0,000 | 100,000 | 0,000 | 100,000 | 0,000 | 0,000      | 0,000 | 61,275 | 2,595 | 71,070 | 9,065 | 0,000  | 0,000 |
| PE1       | 0,000   | 0,000 | 0,000   | 0,000 | 0,000   | 0,000 | 0,000   | 0,000 | 89,855     | 5,480 | 10,015 | 3,345 | 25,035 | 3,557 | 91,155 | 6,979 |
| PE2       | 0,000   | 0,000 | 0,000   | 0,000 | 0,000   | 0,000 | 0,000   | 0,000 | 10,145     | 5,480 | 28,715 | 0,742 | 3,895  | 5,508 | 8,845  | 6,979 |

| Condition | WT      |       |         |       |         |       |         |       |
|-----------|---------|-------|---------|-------|---------|-------|---------|-------|
|           | NT      |       | AON4    |       | AON17   |       | SON     |       |
|           | %       | SD    | %       | SD    | %       | SD    | %       | SD    |
| Correct   | 100,000 | 0,000 | 100,000 | 0,000 | 100,000 | 0,000 | 100,000 | 0,000 |
| PE        | 0,000   | 0,000 | 0,000   | 0,000 | 0,000   | 0,000 | 0,000   | 0,000 |

| Condition | c.4539+2064C>T |       |         |       |        |       |        |       |
|-----------|----------------|-------|---------|-------|--------|-------|--------|-------|
|           | NT             |       | AON4    |       | AON17  |       | SON    |       |
|           | %              | SD    | %       | SD    | %      | SD    | %      | SD    |
| Correct   | 54,700         | 5,049 | 100,000 | 0,000 | 87,090 | 8,330 | 52,765 | 6,428 |
| PE        | 45,300         | 5,049 | 0,000   | 0,000 | 12,910 | 8,330 | 47,235 | 6,428 |

| Condition | c.4539+2065C>G |        |         |       |        |        |        |        |
|-----------|----------------|--------|---------|-------|--------|--------|--------|--------|
|           | NT             |        | AON4    |       | AON17  |        | SON    |        |
|           | %              | SD     | %       | SD    | %      | SD     | %      | SD     |
| Correct   | 38,920         | 11,257 | 100,000 | 0,000 | 72,350 | 11,865 | 35,355 | 11,703 |
| PE        | 61,080         | 11,257 | 0,000   | 0,000 | 27,650 | 11,865 | 64,645 | 11,703 |

| Condition | WT      |       |         |       |         |       |         |       | c.4634+741A>G |        |         |       |         |       |        |        |
|-----------|---------|-------|---------|-------|---------|-------|---------|-------|---------------|--------|---------|-------|---------|-------|--------|--------|
|           | NT      |       | AON1    |       | AON2    |       | SON     |       | NT            |        | AON1    |       | AON2    |       | SON    |        |
|           | %       | SD    | %       | SD    | %       | SD    | %       | SD    | %             | SD     | %       | SD    | %       | SD    | %      | SD     |
| Correct   | 100,000 | 0,000 | 100,000 | 0,000 | 100,000 | 0,000 | 100,000 | 0,000 | 21,590        | 7,934  | 100,000 | 0,000 | 100,000 | 0,000 | 19,630 | 6,831  |
| PE1       | 0,000   | 0,000 | 0,000   | 0,000 | 0,000   | 0,000 | 0,000   | 0,000 | 13,905        | 9,694  | 0,000   | 0,000 | 0,000   | 0,000 | 16,265 | 9,525  |
| PE2       | 0,000   | 0,000 | 0,000   | 0,000 | 0,000   | 0,000 | 0,000   | 0,000 | 64,505        | 17,628 | 0,000   | 0,000 | 0,000   | 0,000 | 64,110 | 16,362 |

| Condition | WT      |       |         |       |         |       |         |       | c.6283-78G>T |       |         |       |         |       |        |       |
|-----------|---------|-------|---------|-------|---------|-------|---------|-------|--------------|-------|---------|-------|---------|-------|--------|-------|
|           | NT      |       | AON1    |       | AON2    |       | SON     |       | NT           |       | AON1    |       | AON2    |       | SON    |       |
|           | %       | SD    | %       | SD    | %       | SD    | %       | SD    | %            | SD    | %       | SD    | %       | SD    | %      | SD    |
| Correct   | 100,000 | 0,000 | 100,000 | 0,000 | 100,000 | 0,000 | 100,000 | 0,000 | 70,500       | 1,400 | 100,000 | 0,000 | 100,000 | 0,000 | 68,530 | 3,295 |
| PE        | 0,000   | 0,000 | 0,000   | 0,000 | 0,000   | 0,000 | 0,000   | 0,000 | 29,500       | 1,400 | 0,000   | 0,000 | 0,000   | 0,000 | 31,470 | 3,295 |
